# Supplementary material for: Betulinic acid decreases lipid accumulation in adipogenesis-induced human mesenchymal stem cells with upregulation of PGC-1α and UCP-1 and post-transcriptional downregulation of adiponectin and leptin secretion
Source: PeerJ. 2021 Oct 14;9:e12321. doi: 10.7717/peerj.12321 (PMC8520689; doi:10.7717/peerj.12321)
Supplement: Supplemental Information 7 [file peerj-09-12321-s007.xlsx]

## Sheet: Sheet1
D10							D14
4 h							4 h
BA (µM)	Glucose uptake (mmol/ml)			Average (mmol/ml)	S.D.		BA (µM)	Glucose uptake (mmol/ml)			Average (mmol/ml)	S.D.
	1	2	3					1	2	3
CGM	0.6	0.3	0.6	0.5	0.173205		CGM	0.825	0.225	1.125	0.725	0.458258
ADM	0.9	1.5	1.5	1.3	0.34641		ADM	0.825	1.425	1.125	1.125	0.3
ADM+ BetA 10 µM	1.2	0.9	1.2	1.1	0.173205		ADM+ BetA 10 µM	1.125	1.425	0.825	1.125	0.3
ADM+ BetA 15 µM	1.2	0.9	1.2	1.1	0.173205		ADM+ BetA 15 µM	1.125	1.125	1.125	1.125	0
8 h							8 h
BA (µM)	Glucose uptake (mmol/ml)			Average (mmol/ml)	S.D.		BA (µM)	Glucose uptake (mmol/ml)			Average (mmol/ml)	S.D.
	1	2	3					1	2	3
CGM	2.1	1.8	2.4	2.1	0.3		CGM	2.1	2.4	2.1	2.2	0.173205
ADM	2.1	2.1	2.1	2.1	0		ADM	2.1	2.1	2.4	2.2	0.173205
ADM+ BetA 10 µM	2.4	2.1	2.1	2.2	0.173205		ADM+ BetA 10 µM	2.7	3	2.7	2.8	0.173205
ADM+ BetA 15 µM	2.1	1.5	1.8	1.8	0.3		ADM+ BetA 15 µM	2.7	2.7	2.7	2.7	0
