# Supplementary material for: Betulinic acid decreases lipid accumulation in adipogenesis-induced human mesenchymal stem cells with upregulation of PGC-1α and UCP-1 and post-transcriptional downregulation of adiponectin and leptin secretion
Source: PeerJ. 2021 Oct 14;9:e12321. doi: 10.7717/peerj.12321 (PMC8520689; doi:10.7717/peerj.12321)
Supplement: Supplemental Information 8 [file peerj-09-12321-s008.xlsx]

## Sheet: Adiponectin
AM
D10							D10
BA (µM)	1 (pg/ml)	2 (pg/ml)	3 (pg/ml)	Average (pg/ml)	S.D.		BA (µM)	1 (ng/ml)	2 (ng/ml)	3 (ng/ml)	Average (ng/ml)	S.D.
0	491.75	484.06	484.06	486.623	4.43982		0	0.49175	0.48406	0.48406	0.486623	0.00443982
10	484.06	444.91	465.94	464.97	19.593		10	0.48406	0.44491	0.46594	0.46497	0.019593
15	472.44	473.74	468.55	471.577	2.70056		15	0.47244	0.47374	0.46855	0.471577	0.00270056
D14							D14
BA (µM)	1 (pg/ml)	2 (pg/ml)	3 (pg/ml)	Average (pg/ml)	S.D.		BA (µM)	1 (ng/ml)	2 (ng/ml)	3 (ng/ml)	Average (ng/ml)	S.D.
0	18312	18934	18314	18520	358.536		0	18.312	18.934	18.314	18.52	0.358536
10	14787	12096	15321	14068	1728.55		10	14.787	12.096	15.321	14.068	1.72855
15	15518	14785	15843	15382	541.953		15	15.518	14.785	15.843	15.382	0.541953
D17							D17
BA (µM)	1 (pg/ml)	2 (pg/ml)	3 (pg/ml)	Average (pg/ml)	S.D.		BA (µM)	1 (ng/ml)	2 (ng/ml)	3 (ng/ml)	Average (ng/ml)	S.D.
0	109906	132597	121720	121408	11348.7		0	109.906	132.597	121.72	121.408	11.3487
10	87208	78678	96220	87368.7	8772.1		10	87.208	78.678	96.22	87.3687	8.7721
15	83937	79007	75661	79535	4163.19		15	83.937	79.007	75.661	79.535	4.16319

## Sheet: IL-6
AM
D10
BA (µM)	1 (pg/ml)	2 (pg/ml)	3 (pg/ml)	Average (pg/ml)	S.D.
0	0.32	0.32	0.42	0.353333	0.057735
10	0.42	0.32	0.32	0.353333	0.057735
15	0.32	0.42	0.42	0.386667	0.057735
D14
BA (µM)	1 (pg/ml)	2 (pg/ml)	3 (pg/ml)	Average (pg/ml)	S.D.
0	0.32	0.32	0.32	0.32	0
10	0.32	<0.29↓	0.32	0.32	0
15	0.32	0.32	0.32	0.32	0
D17
BA (µM)	1 (pg/ml)	2 (pg/ml)	3 (pg/ml)	Average (pg/ml)	S.D.
0	0.66	0.42	0.66	0.58	0.138564
10	0.32	0.54	0.32	0.393333	0.127017
15	0.32	0.32	0.32	0.32	0

## Sheet: Leptin
AM
D10							D10
BA (µM)	1 (pg/ml)	2 (pg/ml)	3 (pg/ml)	Average (pg/ml)	S.D.		BA (µM)	1 (ng/ml)	2 (ng/ml)	3 (ng/ml)	Average (ng/ml)	S.D.
0	458.63	481.86	491.52	477.337	16.9051		0	0.45863	0.48186	0.49152	0.477337	0.0169051
10	560.09	492.05	526.03	526.057	34.02		10	0.56009	0.49205	0.52603	0.526057	0.03402
15	578.73	608.21	584.77	590.57	15.5723		15	0.57873	0.60821	0.58477	0.59057	0.0155723
D14							D14
BA (µM)	1 (pg/ml)	2 (pg/ml)	3 (pg/ml)	Average (pg/ml)	S.D.		BA (µM)	1 (ng/ml)	2 (ng/ml)	3 (ng/ml)	Average (ng/ml)	S.D.
0	974.7	1008	973.29	985.33	19.6454		0	0.9747	1.008	0.97329	0.98533	0.0196454
10	826.06	898.69	683.72	802.823	109.353		10	0.82606	0.89869	0.68372	0.802823	0.109353
15	956.14	1017	935.7	969.613	42.2915		15	0.95614	1.017	0.9357	0.969613	0.0422915
D17							D17
BA (µM)	1 (pg/ml)	2 (pg/ml)	3 (pg/ml)	Average (pg/ml)	S.D.		BA (µM)	1 (ng/ml)	2 (ng/ml)	3 (ng/ml)	Average (ng/ml)	S.D.
0	2266	2168	2024	2152.67	121.726		0	2.266	2.168	2.024	2.15267	0.121726
10	1586	1611	1660	1619	37.6431		10	1.586	1.611	1.66	1.619	0.0376431
15	1622	1438	1429	1496.33	108.924		15	1.622	1.438	1.429	1.49633	0.108924
