# Supplementary material for: Betulinic acid decreases lipid accumulation in adipogenesis-induced human mesenchymal stem cells with upregulation of PGC-1α and UCP-1 and post-transcriptional downregulation of adiponectin and leptin secretion
Source: PeerJ. 2021 Oct 14;9:e12321. doi: 10.7717/peerj.12321 (PMC8520689; doi:10.7717/peerj.12321)
Supplement: Supplemental Information 9 [file peerj-09-12321-s009.xlsx]

## Sheet: D3
CGM
BA 0 (µM)				BA 10 (µM)				BA 15 (µM)
Target Name	Cт GAPDH	Cт Target		Target Name	Cт GAPDH	Cт Target		Target Name	Cт GAPDH	Cт Target
ALP	21.7011	29.8875		ALP	20.8762	29.0191		ALP	21.343	28.9178
ALP	20.9036	27.7663		ALP	21.1337	28.7028		ALP	21.6347	29.2604
ALP	21.5857	29.3926		ALP	21.5495	28.9126		ALP	21.2793	28.8818
β-catenin	21.7011	24.6966		β-catenin	20.8762	23.9108		β-catenin	21.343	24.8309
β-catenin	20.9036	24.4967		β-catenin	21.1337	23.8831		β-catenin	21.6347	24.8101
β-catenin	21.5857	24.4164		β-catenin	21.5495	23.9209		β-catenin	21.2793	24.5355
WNT3A	21.7011	24.6411		WNT3A	20.8762	24.2094		WNT3A	21.343	24.7854
WNT3A	20.9036	24.234		WNT3A	21.1337	24.1345		WNT3A	21.6347	24.86
WNT3A	21.5857	24.2933		WNT3A	21.5495	24.1877		WNT3A	21.2793	24.7928
C/EBP-α	21.7011	26.944		C/EBP-α	20.8762	27.0898		C/EBP-α	21.343	28.3297
C/EBP-α	20.9036	27.1309		C/EBP-α	21.1337	27.2042		C/EBP-α	21.6347	28.6641
C/EBP-α	21.5857	27.1061		C/EBP-α	21.5495	27.561		C/EBP-α	21.2793	28.6306
PPARγ2	21.7011	25.9906		PPARγ2	20.8762	25.9989		PPARγ2	21.343	26.3984
PPARγ2	20.9036	26.2014		PPARγ2	21.1337	25.9045		PPARγ2	21.6347	26.2355
PPARγ2	21.5857	25.9304		PPARγ2	21.5495	25.7844		PPARγ2	21.2793	26.4665
OM
BA 0 (µM)				BA 10 (µM)				BA 15 (µM)
Target Name	Cт GAPDH	Cт Target		Target Name	Cт GAPDH	Cт Target		Target Name	Cт GAPDH	Cт Target
ALP	22.1769	31.1141		ALP	23.6851	31.0147		ALP	20.8087	29.9306
ALP	22.1772	30.7998		ALP	23.4543	31.8146		ALP	20.59	30.4987
ALP	21.6574	30.9548		ALP	23.3809	31.7893		ALP	20.8298	30.3383
β-catenin	22.1769	25.2371		β-catenin	23.6851	26.8772		β-catenin	20.8087	24.4579
β-catenin	22.1772	25.3533		β-catenin	23.4543	27.0011		β-catenin	20.59	24.7134
β-catenin	21.6574	25.3198		β-catenin	23.3809	26.9652		β-catenin	20.8298	24.5765
BMP	22.1769	25.9536		BMP	23.6851	27.6957		BMP	20.8087	25.3465
BMP	22.1772	25.9473		BMP	23.4543	27.5149		BMP	20.59	25.5003
BMP	21.6574	25.935		BMP	23.3809	27.8736		BMP	20.8298	25.4917
RUNX2	22.1769	26.4401		RUNX2	23.6851	0.152751		RUNX2	20.8087	25.7336
RUNX2	22.1772	26.4689		RUNX2	23.4543	0.120162		RUNX2	20.59	25.9048
RUNX2	21.6574	26.5874		RUNX2	23.3809	0.0184129		RUNX2	20.8298	25.7803
WNT3A	22.1769	26.2406		WNT3A	23.6851	27.849		WNT3A	20.8087	25.7336
WNT3A	22.1772	26.0678		WNT3A	23.4543	27.8816		WNT3A	20.59	25.9048
WNT3A	21.6574	26.0564		WNT3A	23.3809	27.9833		WNT3A	20.8298	25.7803
AM
BA 0 (µM)				BA 10 (µM)				BA 15 (µM)
Target Name	Cт GAPDH	Cт Target		Target Name	Cт GAPDH	Cт Target		Target Name	Cт GAPDH	Cт Target
C/EBP-α	20.4163	26.4265		C/EBP-α	20.9391	27.7592		C/EBP-α	20.6426	28.0846
C/EBP-α	20.2053	26.4853		C/EBP-α	21.0191	28.1599		C/EBP-α	20.7531	28.1316
C/EBP-α	20.3625	26.534		C/EBP-α	20.91	28.0307		C/EBP-α	20.6096	28.3581
MYF5	20.9201	25.8354		MYF5	20.4976	25.63		MYF5	20.1585	25.7177
MYF5	21.1143	25.8038		MYF5	20.4437	25.5927		MYF5	20.2149	25.7244
MYF5	21.1559	25.8234		MYF5	20.4993	25.8357		MYF5	20.362	25.6755
PGC-1α	20.4163	23.996		PGC-1α	20.9391	24.7787		PGC-1α	20.6426	24.1784
PGC-1α	20.2053	23.8941		PGC-1α	21.0191	24.8483		PGC-1α	20.7531	24.3036
PGC-1α	20.3625	23.9354		PGC-1α	20.91	24.8443		PGC-1α	20.6096	24.203
PPARγ2	20.4163	25.2811		PPARγ2	20.9391	25.9362		PPARγ2	20.6426	25.7176
PPARγ2	20.2053	25.433		PPARγ2	21.0191	25.9508		PPARγ2	20.7531	25.8382
PPARγ2	20.3625	25.1522		PPARγ2	20.91	26.0424		PPARγ2	20.6096	25.823

## Sheet: D7
AM
BA 0 (µM)				BA 10 (µM)				BA 15 (µM)
Target Name	Cт GAPDH	Cт Target		Target Name	Cт GAPDH	Cт Target		Target Name	Cт GAPDH	Cт Target
Adiponectin	14.4646	21.9945		Adiponectin	14.5205	21.7677		Adiponectin	13.37	21.2135
Adiponectin	14.5433	21.067		Adiponectin	14.292	21.9439		Adiponectin	13.588	21.2813
Adiponectin	14.4369	20.9134		Adiponectin	14.2923	21.7299		Adiponectin	13.6885	21.3549
BMP7	16.8896	32.613		BMP7	17.3928	31.8807		BMP7	17.8534	33.1758
BMP7	16.7382	37.1034		BMP7	17.348	33.5585		BMP7	17.9712	33.6211
BMP7	16.8005	33.4288		BMP7	17.1898	32.206		BMP7	18.1001	32.7616
C/EBP-α	14.4646	26.0587		C/EBP-α	14.5205	26.3654		C/EBP-α	13.37	26.9288
C/EBP-α	14.5433	25.9873		C/EBP-α	14.292	26.7986		C/EBP-α	13.588	26.9474
C/EBP-α	14.4369	25.7836		C/EBP-α	14.2923	26.6194		C/EBP-α	13.6885	26.9623
FABP4	20.9813	20.8609		FABP4	20.9638	20.8332		FABP4	21.3941	21.6148
FABP4	21.0749	20.8738		FABP4	19.524	20.9696		FABP4	21.4039	21.6218
FABP4	21.328	20.8257		FABP4	21.0563	20.9066		FABP4	21.5162	21.6282
IL-6	14.4646	28.9609		IL-6	14.5205	24.941		IL-6	13.37	25.4297
IL-6	14.5433	29.2075		IL-6	14.292	26.56		IL-6	13.588	25.2473
IL-6	14.4369	29.1703		IL-6	14.2923	26.3108		IL-6	13.6885	25.1644
LEP-R	16.8896	29.5779		LEP-R	17.3928	30.1884		LEP-R	17.8534	30.7728
LEP-R	16.7382	29.5188		LEP-R	17.348	30.8788		LEP-R	17.9712	30.601
LEP-R	16.8005	29.9429		LEP-R	17.1898	30.4505		LEP-R	18.1001	31.7342
Leptin	16.8896	25.4737		Leptin	17.3928	25.6278		Leptin	17.8534	25.6271
Leptin	16.7382	25.3868		Leptin	17.348	25.529		Leptin	17.9712	25.4492
Leptin	16.8005	25.4461		Leptin	17.1898	25.4789		Leptin	18.1001	25.5154
MYF5	16.9585	25.8161		MYF5	17.2335	25.9221		MYF5	18.0397	26.0193
MYF5	16.9311	25.8803		MYF5	17.3999	25.9279		MYF5	17.9863	25.9802
MYF5	16.9162	25.8739		MYF5	17.5222	26.0251		MYF5	18.0677	26.0634
PGC-1α	20.9498	28.4715		PGC-1α	19.575	25.5439		PGC-1α	20.9821	25.956
PGC-1α	20.9054	28.5108		PGC-1α	19.5829	25.6289		PGC-1α	20.9618	25.8106
PGC-1α	20.915	28.6121		PGC-1α	19.5854	24.9923		PGC-1α	20.9558	25.9103
PPARγ2	20.9498	23.9553		PPARγ2	19.575	23.4153		PPARγ2	20.9821	24.3651
PPARγ2	20.9054	23.9136		PPARγ2	19.5829	23.3375		PPARγ2	20.9618	24.4436
PPARγ2	20.915	23.9002		PPARγ2	19.5854	23.281		PPARγ2	20.9558	24.5137
PRDM16	16.9585	35.8966		PRDM16	17.2335	35.2692		PRDM16	18.0397	35.6453
PRDM16	16.9311	33.5208		PRDM16	17.3999	35.1313		PRDM16	17.9863	34.6542
PRDM16	16.9162	33.6622		PRDM16	17.5222	34.9975		PRDM16	18.0677	34.2436
UCP-1	20.9498	25.7011		UCP-1	19.575	22.7796		UCP-1	20.9821	24.1688
UCP-1	20.9054	25.5822		UCP-1	19.5829	22.8626		UCP-1	20.9618	23.923
UCP-1	20.915	25.8613		UCP-1	19.5854	22.7573		UCP-1	20.9558	24.1282

## Sheet: D14
OM
BA 0 (µM)				BA 10 (µM)				BA 15 (µM)
Target Name	Cт GAPDH	Cт Target		Target Name	Cт GAPDH	Cт Target		Target Name	Cт GAPDH	Cт Target
ALP	21.9143	30.5392		ALP	22.4021	31.3889		ALP	22.9785	30.9083
ALP	22.0265	30.4787		ALP	22.7967	31.7139		ALP	22.9176	30.8084
ALP	21.8488	30.617		ALP	22.6184	31.587		ALP	23.3498	31.1694
OC	21.9143	26.9083		OC	22.4021	25.9701		OC	22.9785	26.2899
OC	22.0265	26.7229		OC	22.7967	26.3522		OC	22.9176	26.4214
OC	21.8488	26.6966		OC	22.6184	26.5139		OC	23.3498	26.3118
OPN	21.9143	26.9079		OPN	22.4021	26.5463		OPN	22.9785	26.6179
OPN	22.0265	26.9634		OPN	22.7967	26.4094		OPN	22.9176	26.7301
OPN	21.8488	26.9197		OPN	22.6184	26.4304		OPN	23.3498	26.5651
RUNX2	21.9143	24.227		RUNX2	22.4021	23.8544		RUNX2	22.9785	23.8428
RUNX2	22.0265	24.1671		RUNX2	22.7967	23.8738		RUNX2	22.9176	23.8406
RUNX2	21.8488	24.1548		RUNX2	22.6184	23.9152		RUNX2	23.3498	23.8916
AM
BA 0 (µM)				BA 10 (µM)				BA 15 (µM)
Target Name	Cт GAPDH	Cт Target		Target Name	Cт GAPDH	Cт Target		Target Name	Cт GAPDH	Cт Target
Adiponectin	20.1949	23.8239		Adiponectin	20.8566	24.3345		Adiponectin	20.2714	23.8551
Adiponectin	20.5917	23.855		Adiponectin	20.8911	24.4125		Adiponectin	20.2889	23.902
Adiponectin	20.834	23.9363		Adiponectin	20.9767	24.667		Adiponectin	20.5479	24.0141
C/EBP-α	21.6821	26.2176		C/EBP-α	20.9426	26.346		C/EBP-α	21.9099	26.6858
C/EBP-α	21.8731	26.3322		C/EBP-α	20.9278	27.2011		C/EBP-α	21.8532	26.8183
C/EBP-α	21.7666	26.042		C/EBP-α	20.8922	27.4261		C/EBP-α	21.9928	26.9418
FABP4	21.6821	17.3642		FABP4	20.9426	17.6821		FABP4	21.9099	16.9191
FABP4	21.8731	17.6686		FABP4	20.9278	17.5629		FABP4	21.8532	16.6936
FABP4	21.7666	17.4951		FABP4	20.8922	17.4373		FABP4	21.9928	16.8871
IL-6	20.1949	32.2073		IL-6	20.8566	31.18		IL-6	20.2714	26.9938
IL-6	20.5917	32.9986		IL-6	20.8911	31.2228		IL-6	20.2889	27.0313
IL-6	20.834	33.0241		IL-6	20.9767	32.5535		IL-6	20.5479	27.2246
LEP-R	20.1949	27.3566		LEP-R	20.8566	26.1932		LEP-R	20.2714	25.8285
LEP-R	20.5917	27.456		LEP-R	20.8911	26.524		LEP-R	20.2889	25.8932
LEP-R	20.834	27.6525		LEP-R	20.9767	26.6205		LEP-R	20.5479	25.9249
Leptin	14.8278	24.8253		Leptin	14.9491	25.6612		Leptin	14.0875	24.5735
Leptin	14.7985	24.8183		Leptin	14.9429	25.522		Leptin	14.1874	24.414
Leptin	14.6703	24.897		Leptin	14.8827	25.6896		Leptin	14.2168	24.4548
PGC-1α	14.8278	24.9908		PGC-1α	14.9491	25.9993		PGC-1α	14.0875	24.8792
PGC-1α	14.7985	25.1314		PGC-1α	14.9429	25.9358		PGC-1α	14.1874	24.8976
PGC-1α	14.6703	24.9885		PGC-1α	14.8827	25.9025		PGC-1α	14.2168	25.0934
PPARγ2	21.6821	25.2619		PPARγ2	20.9426	25.0181		PPARγ2	21.9099	25.6086
PPARγ2	21.8731	24.372		PPARγ2	20.9278	24.764		PPARγ2	21.8532	25.7773
PPARγ2	21.7666	25.0706		PPARγ2	20.8922	24.8954		PPARγ2	21.9928	25.6747
UCP-1	14.8278	26.2651		UCP-1	14.9491	28.1567		UCP-1	14.0875	25.7291
UCP-1	14.7985	26.0423		UCP-1	14.9429	27.912		UCP-1	14.1874	25.9024
UCP-1	14.6703	26.5579		UCP-1	14.8827	27.8088		UCP-1	14.2168	26.0245

## Sheet: GLUT4
D7
CGM				AM				AM				AM
BA 0 (µM)				BA 0 (µM)				BA 10 (µM)				BA 15 (µM)
Target Name	Cт GAPDH	Cт Target		Target Name	Cт GAPDH	Cт Target		Target Name	Cт GAPDH	Cт Target		Target Name	Cт GAPDH	Cт Target
GLUT4	20.6461	26.7046		GLUT4	21.9313	25.7968		GLUT4	21.4499	26.2085		GLUT4	21.2144	26.145
GLUT4	20.6771	26.6967		GLUT4	21.7905	25.6959		GLUT4	21.4572	26.0234		GLUT4	21.0876	26.3137
GLUT4	20.6988	26.8089		GLUT4	21.7816	25.7467		GLUT4	21.3656	26.1344		GLUT4	21.0556	26.1488
D14
CGM				AM				AM				AM
BA 0 (µM)				BA 0 (µM)				BA 10 (µM)				BA 15 (µM)
Target Name	Cт GAPDH	Cт Target		Target Name	Cт GAPDH	Cт Target		Target Name	Cт GAPDH	Cт Target		Target Name	Cт GAPDH	Cт Target
GLUT4	21.139	25.6621		GLUT4	20.3414	24.9007		GLUT4	20.8093	25.9898		GLUT4	20.8711	25.0368
GLUT4	21.1061	25.6853		GLUT4	20.7588	24.7742		GLUT4	20.8284	25.9273		GLUT4	20.9002	25.165
GLUT4	21.148	25.754		GLUT4	20.1409	24.6781		GLUT4	20.8824	25.9645		GLUT4	20.8715	25.0565
